# Supplementary material for: Synthetic enforcement of STING signaling in cancer cells appropriates the immune microenvironment for checkpoint inhibitor therapy
Source: PubMed Central journal article supplement — Sci Adv. 2023 Mar 15;9(11):eadd8564. doi: 10.1126/sciadv.add8564 (PMC10017047; doi:10.1126/sciadv.add8564), 2023-03-15
Supplement: sciadv.add8564_sm.pdf [file sciadv.add8564_sm.pdf]

Supplementary Materials for  
**Synthetic enforcement of STING signaling in cancer cells appropriates the  
immune microenvironment for checkpoint inhibitor therapy**

Larsen Vornholz *et al.*

Corresponding author: Jürgen Ruland, [j.ruland@tum.de](mailto:j.ruland@tum.de)

*Sci. Adv.* **9**, eadd8564 (2023)  
DOI: 10.1126/sciadv.add8564

**The PDF file includes:**

Figs. S1 to S7  
Legends for tables S1 to S3

**Other Supplementary Material for this manuscript includes the following:**

Tables S1 to S3

## SUPPLEMENTARY FIGURES

### **Fig. S1. GSEA of dMMR vs. pMMR human primary organoids.**

(A) GSEA of differentially expressed gene sets from the Reactome database comparing pMMR vs. dMMR tumor organoids (+ve NES: dMMR).

### **Fig. S2. cGAS/STING controls IFN signaling in dMMR tumor cells.**

(A, B) Genetically modified MC38 tumor cells were confirmed by western blotting. (C) Cytosolic DNA of MC38 tumor cells was isolated with a commercial kit and quantified by qPCR with primers specific for genomic DNA. (D) Cytosolic cGAMP levels were quantified by ELISA of cell lysates of cultured MC38 tumor cells. (E) IFN- $\beta$  production from MC38 tumor cells was quantified by ELISA. (F) Cytosolic DNA of MC38 tumor cells was isolated with a commercial kit and quantified by qPCR with primers specific for genomic DNA. (G) Cytosolic cGAMP levels were quantified by ELISA of cell lysates of cultured MC38 tumor cells. (H) IFN- $\beta$  production from MC38 tumor cells was quantified by ELISA. (I) The phosphorylation of STAT1 in cultured MC38 cells was detected by western blotting. (J) The relative gene expression of *Isg15*, *Ccl5* and *Cxcl10* in cultured MC38 tumor cells was quantified by qPCR. (K) The phosphorylation of STAT1 in cultured MC38 cells was detected by western blotting. (L) The relative gene expression of *Isg15*, *Ccl5* and *Cxcl10* in cultured MC38 tumor cells was quantified by qPCR. The data represent n=3 independent experiments (C, D, F, G, J, L) or are representative of n=2 independent experiments (E, H). One-way ANOVA (D, E, G, H, J, L) or Student's t test (C, F) was used to determine significance.

### **Fig. S3. STING-mediated IFN signaling in dMMR CRC controls immunogenicity.**

(A, B) Genetically modified MC38 tumor cells were treated with anti-IFNAR1 blocking antibodies (30  $\mu\text{g/ml}$ ) for 24 h, and the relative gene expression of *Isg15*, *Ccl5* and *Cxcl10* was quantified by qPCR. (C, D) *In vitro* proliferation of cultured MC38 tumor cells. (E) Endpoint size of subcutaneously grown WT, MLH1<sup>-/-</sup> or MLH1/STING<sup>-/-</sup> MC38 tumors (n=5) or (F) WT, MSH2<sup>-/-</sup> or MSH2/STING<sup>-/-</sup> MC38 tumors (n=7-10). (G, H) Tumor-bearing mice were treated without or with anti-IFNAR1 (200  $\mu\text{g/mouse}$ ) blocking antibodies every three days starting at Day 0 (n=3-5). (I, J) Tumor-bearing mice were treated without or with anti-CXCR3 (200  $\mu\text{g/mouse}$ ) blocking antibodies every three days starting at Day 0 (n=3-5). The data are representative of n=2 independent experiments (A, B) or represent n=3 independent experiments (C, D). The data are presented as the mean  $\pm$  SEM (G-J). One-way ANOVA (E, F) or Student's t test (A, B) was used to determine significance.

**Fig. S4. Synthetically enforced STING<sup>N153S</sup> drives IFN signaling.**

(A) IFN- $\beta$  production from STING mutant MC38 tumor cells was quantified by ELISA. (B) The phosphorylation of STAT1 in cultured STING mutant MC38 cells was detected by western blotting. (C) The relative gene expression of *Isg15* in cultured STING mutant MC38 tumor cells was quantified by qPCR. The data are representative of n=2 independent experiments (A, C). One-way ANOVA (A, C) was used to determine significance.

**Fig. S5. Synthetically enforced STING signaling promotes antitumor immunity.**

(A) Endpoint tumor weight of subcutaneously grown WT vs. STING<sup>N153S</sup> MC38 tumors in syngeneic WT C57Bl/6 mice (n=5). (B) *In vitro* proliferation of cultured MC38 tumor cells. (C) Growth of subcutaneously inoculated WT and STING<sup>N153S</sup> MC38 tumor cells in NOD-SCID mice (n=4). (D) *In vitro* proliferation of cultured STING mutant MC38 tumor cells. (E) Growth of subcutaneously inoculated STING mutant MC38 tumor cells in syngeneic C57Bl/6

mice (n=5). (F) FACS analyses displaying the percentages of Ifng and PD1 in CD8+ T cells from subcutaneously grown MC38 tumors in syngeneic WT C57Bl/6 mice explanted on Day 16. The data are presented as the mean  $\pm$  SEM from n=3 independent experiments (B) or are representative of n=2 independent experiments (D). Student's t test (A, F) was used to determine significance.

**Fig. S6. Tumor cell-intrinsic STING enforcement sensitizes to immune checkpoint inhibitor therapy.**

(A) Endpoint tumor weight of subcutaneously grown WT vs. mixSTING<sup>N153S</sup> MC38 tumors that were treated with ICI therapy (n=10). (B) Survival of WT vs. mixSTING<sup>N153S</sup> tumor-bearing mice treated with ICI therapy every three days starting on Day 10 (n=9-10). Student's t test (A) or log-rank (Mantel-Cox) test (B) was used to determine significance.

**Fig. S7. The expression of STING<sup>N153S</sup> in a subset of tumor cells reprograms the TME.**

(A) Heatmap displaying the different cell clusters (y-axis) and the antigen intensity of the antibody-labeled cells (x-axis). (B) UMAP plot displaying the annotated clusters comparing the WT (gray) vs. mixSTING<sup>N153S</sup> (blue) conditions. (C) WT or mixSTING<sup>N153S</sup> MC38 tumor cells were subcutaneously inoculated into syngeneic C57Bl/6 mice, and the percentages (CD4, CD8, NK, CD11c, CD8+ DCs) of live/CD45+ cells in the tumor were quantified by FACS analysis (n=4-5). (D) Differentially expressed gene sets obtained via GSEA by using g:profiler on all GO:BP terms enriched for fewer than 400 genes considering only the DC clusters "MHCII+ DCs" and "CD11b+ DCs". Student's t test (C) was used to determine significance.

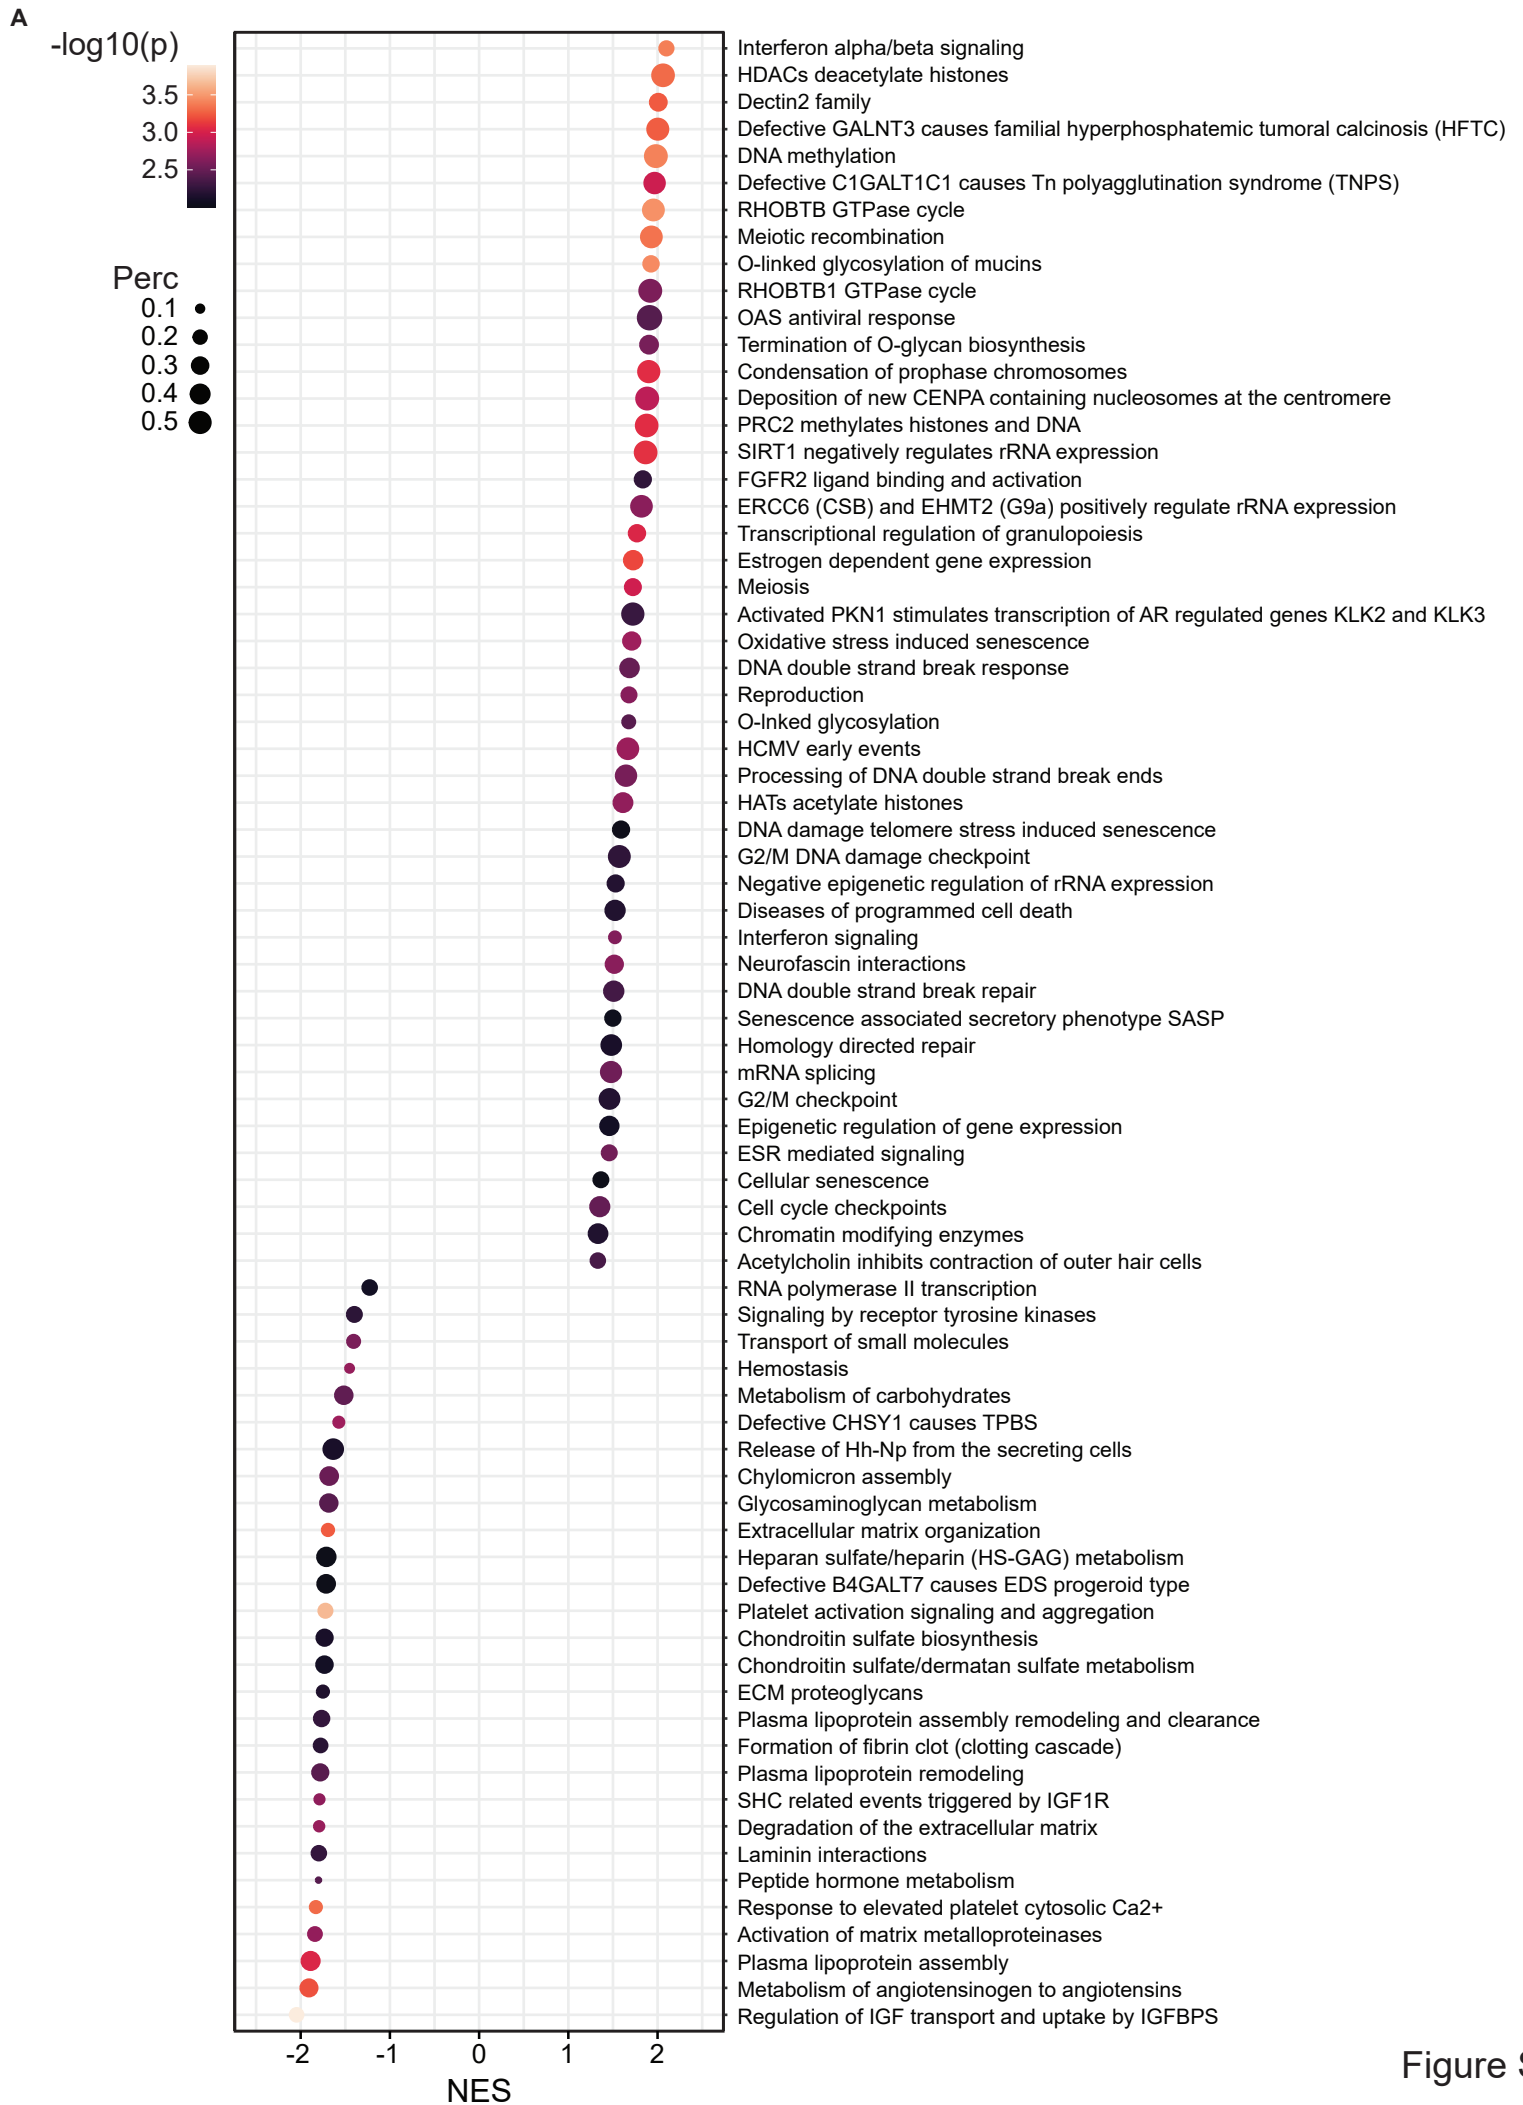

Figure S1

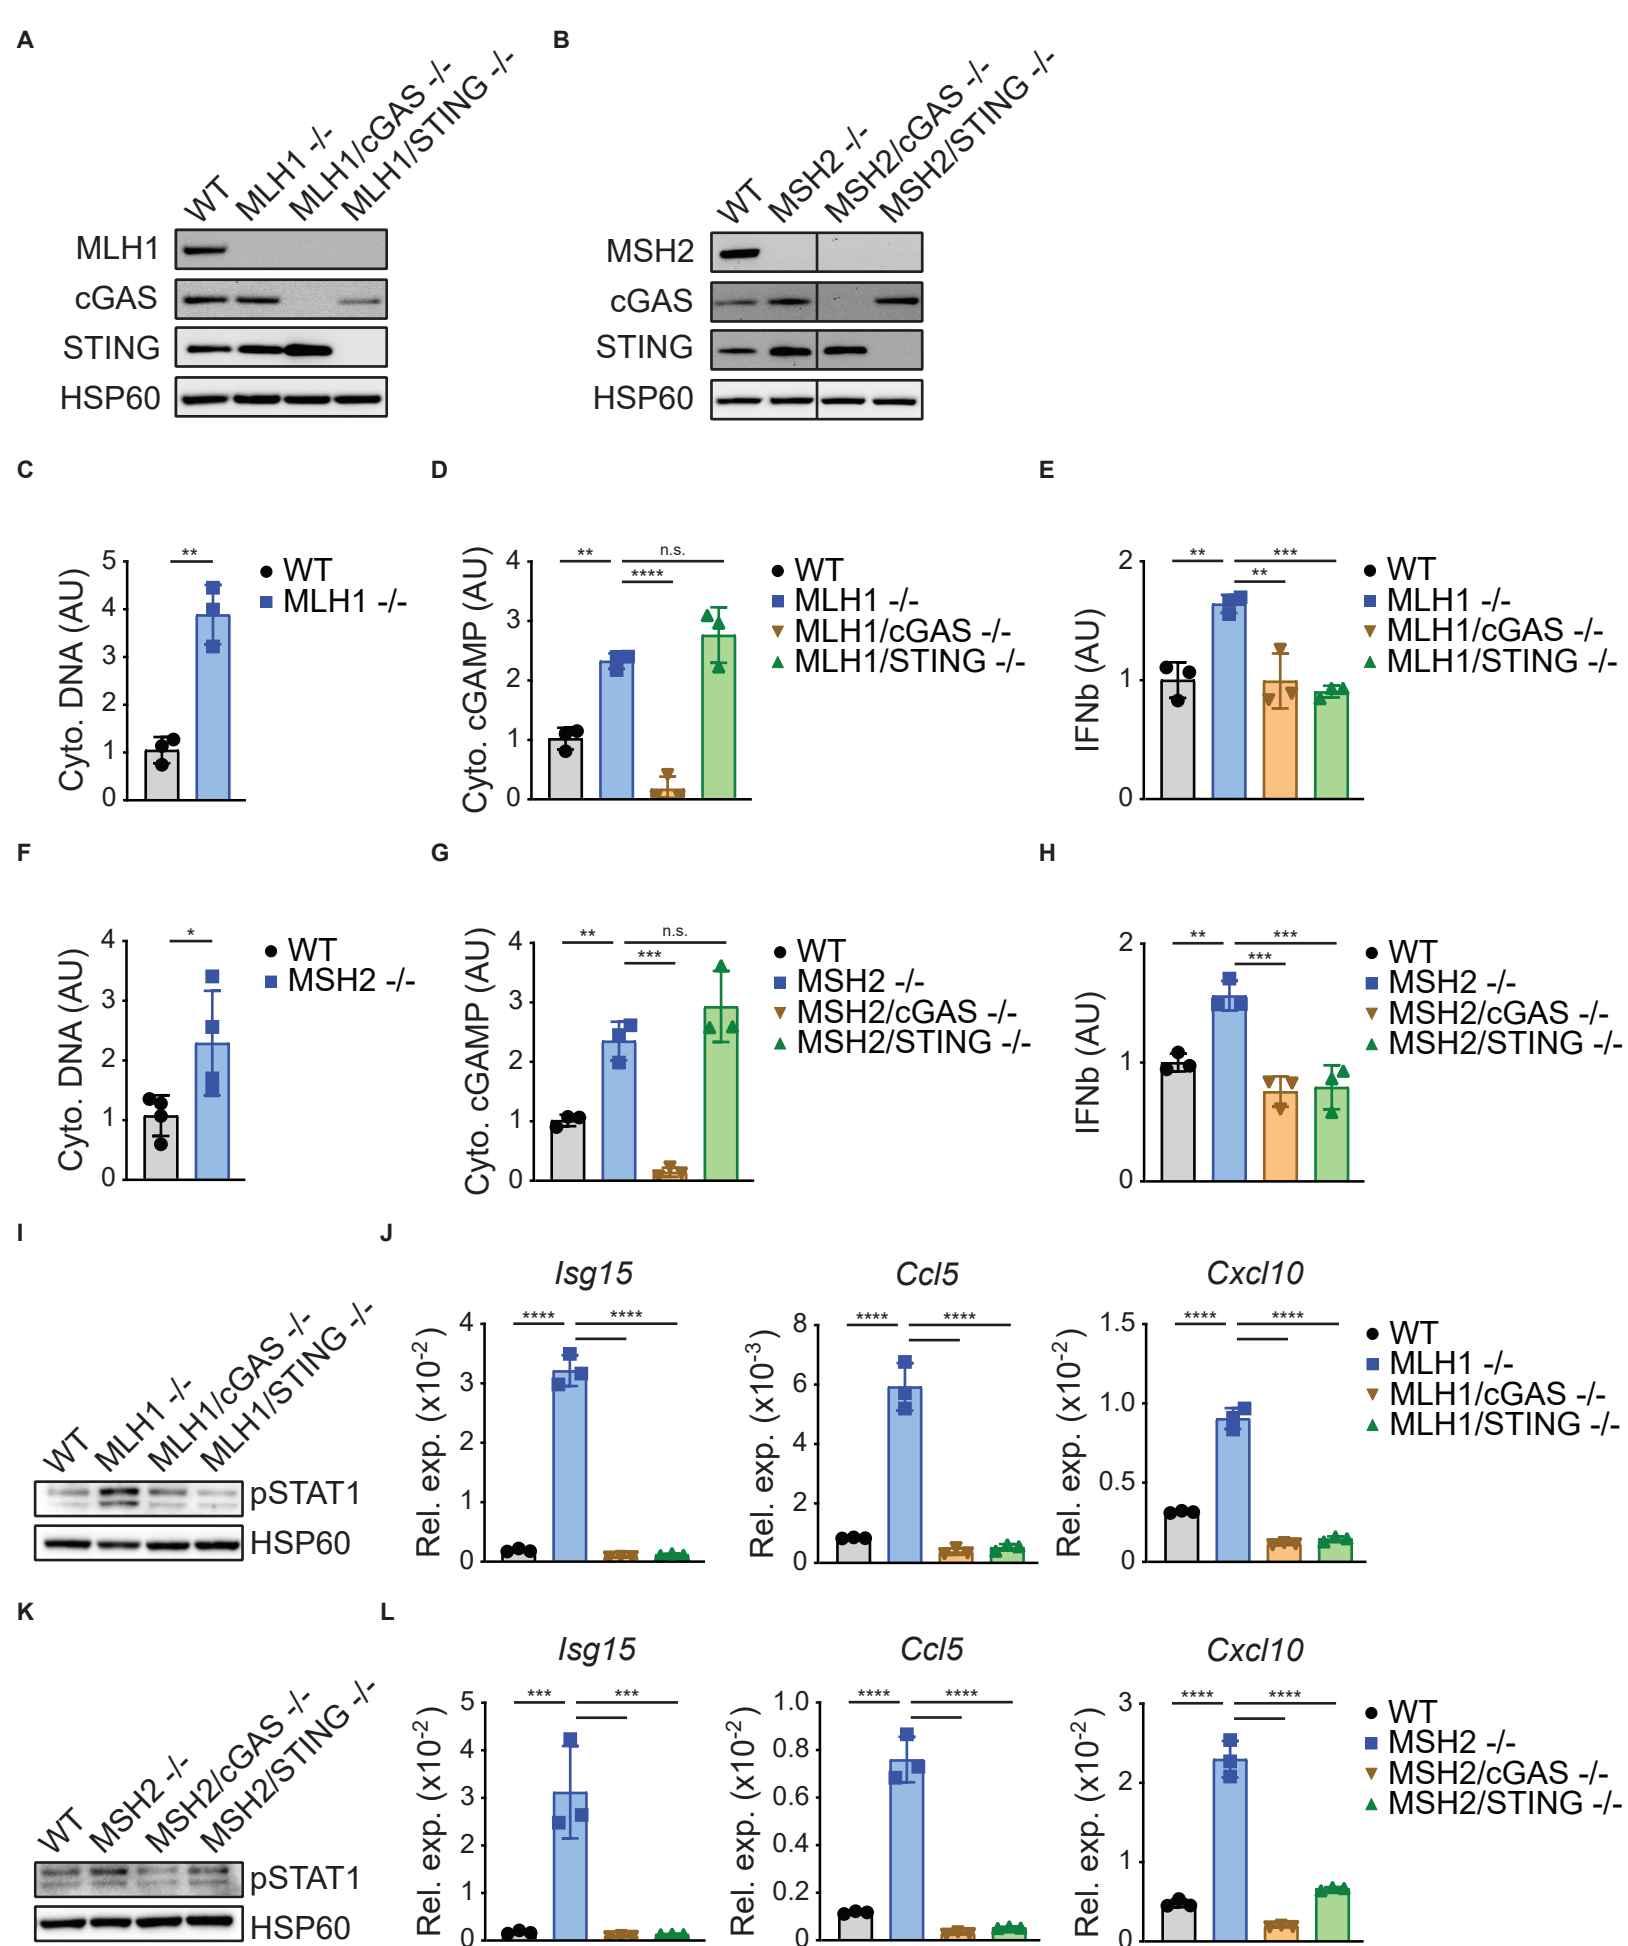

Figure S2

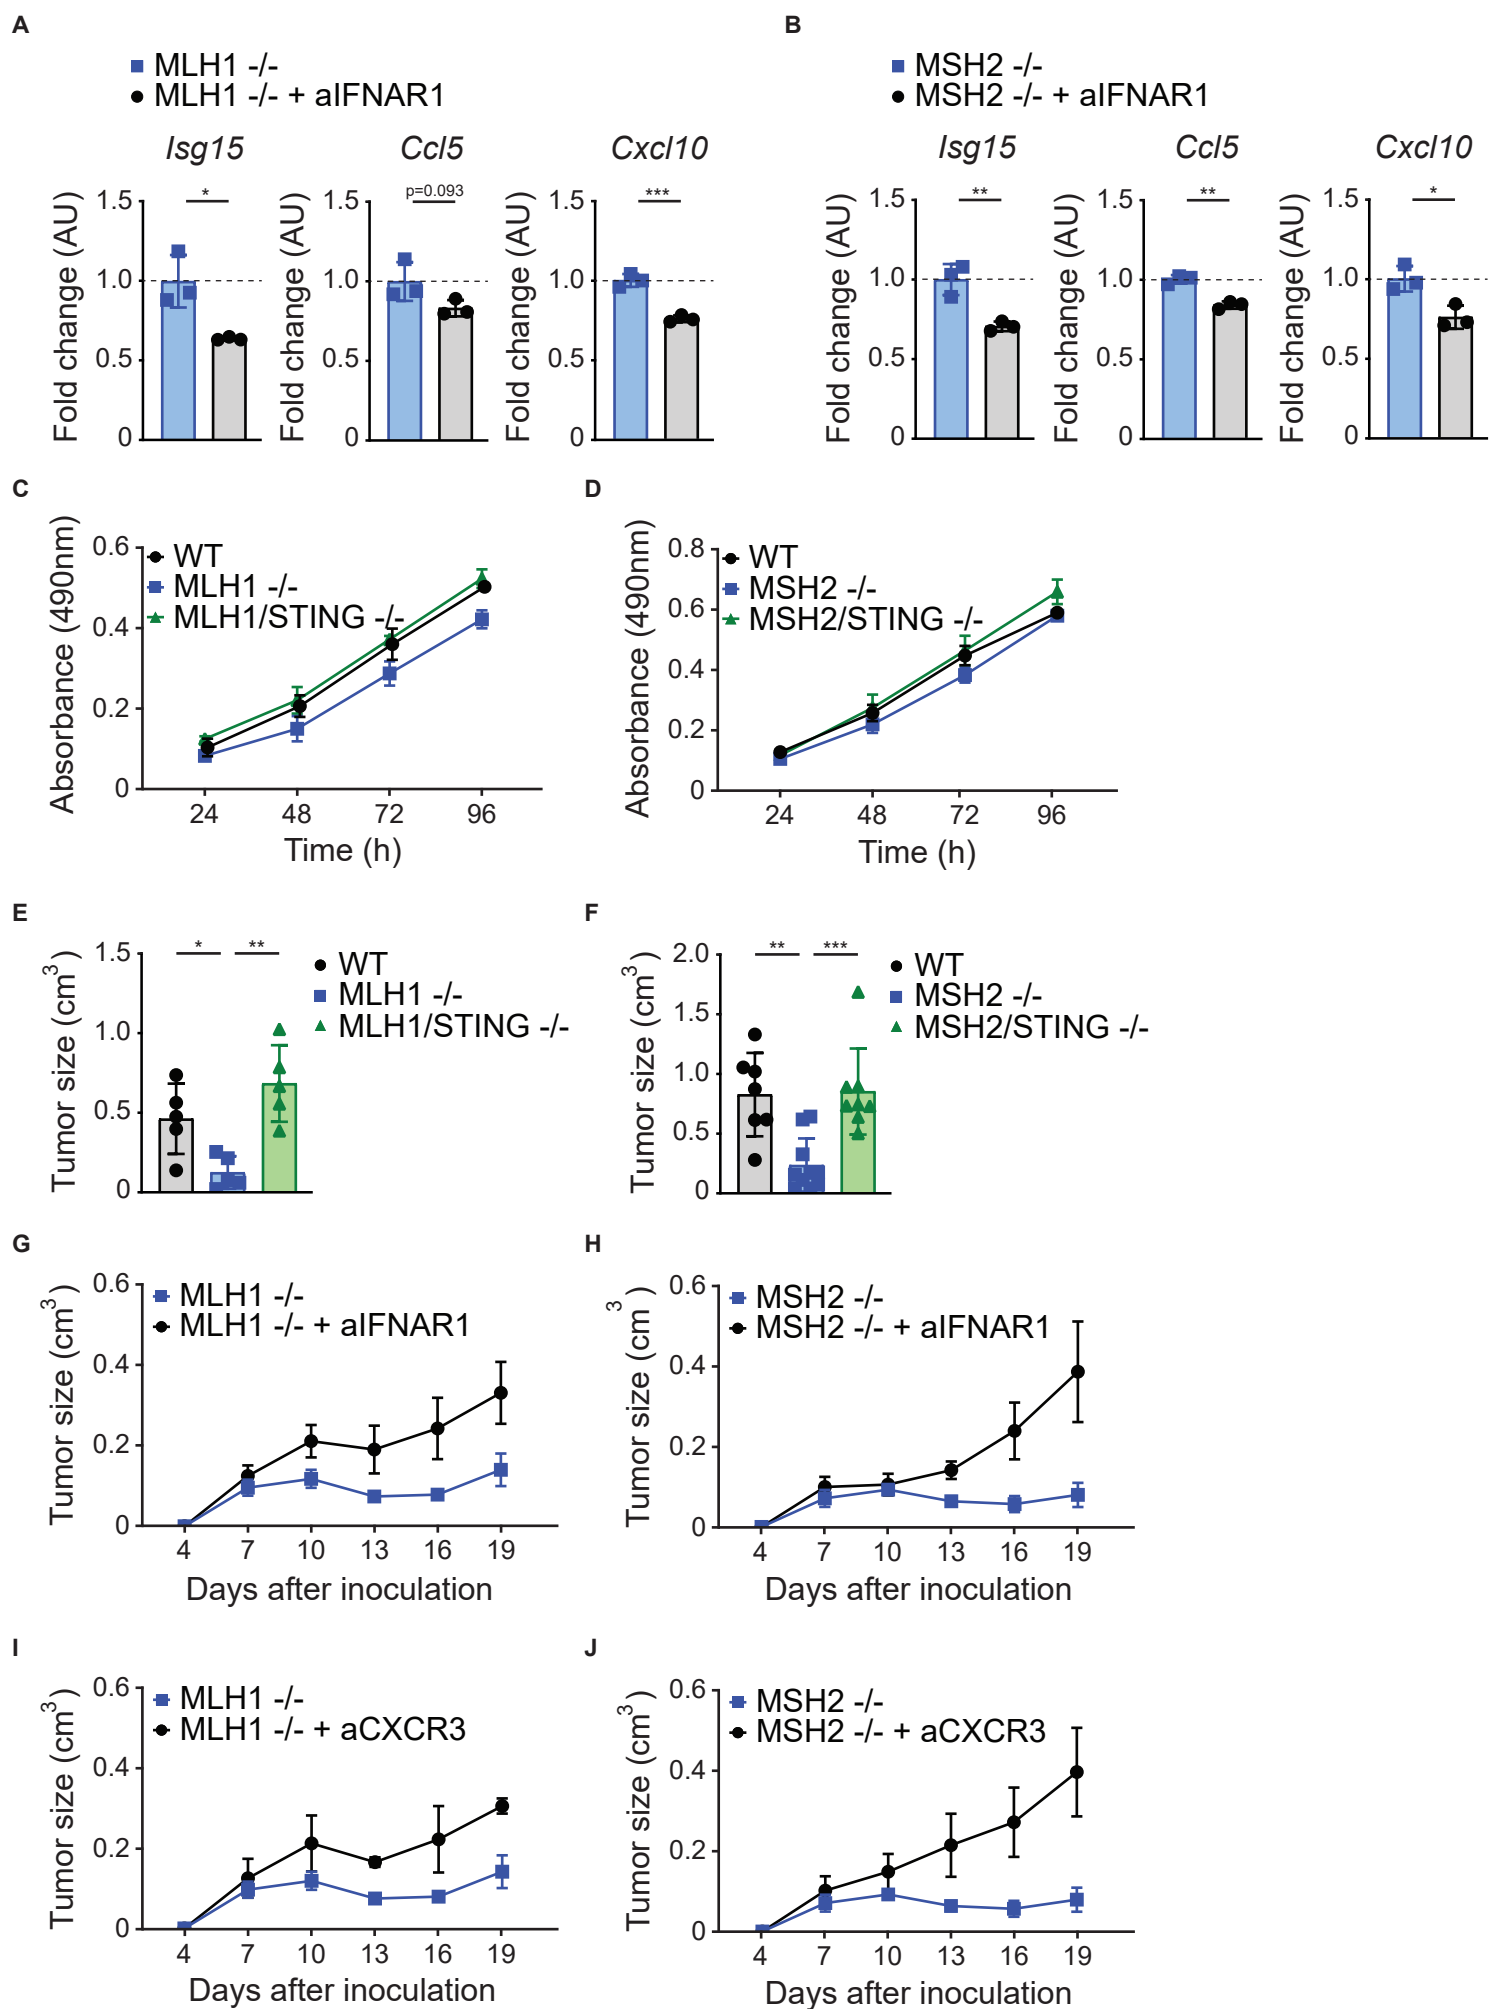

Figure S3

**A**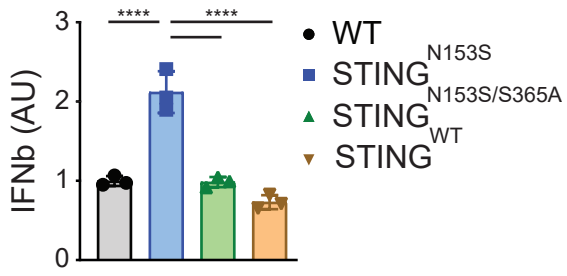**B**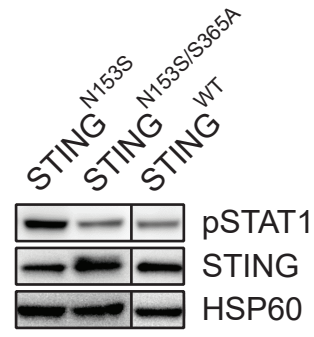**C**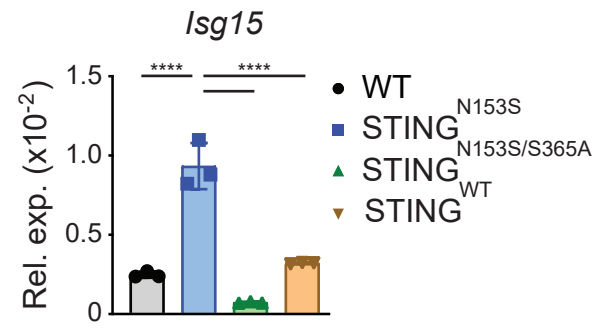



A

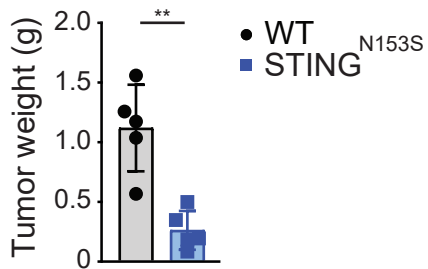

B

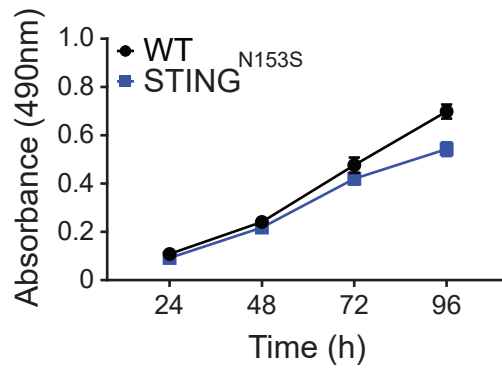

C

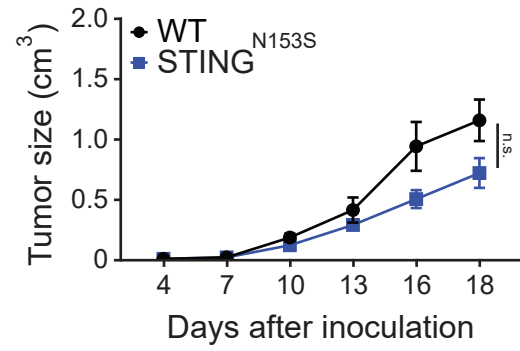

D

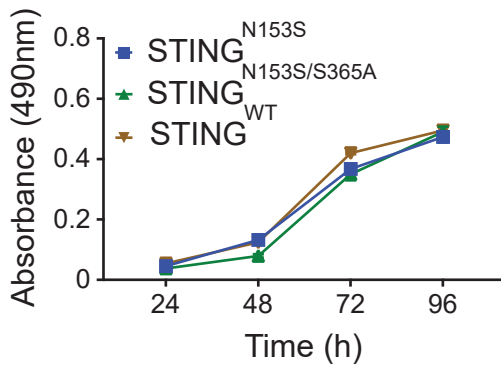

E

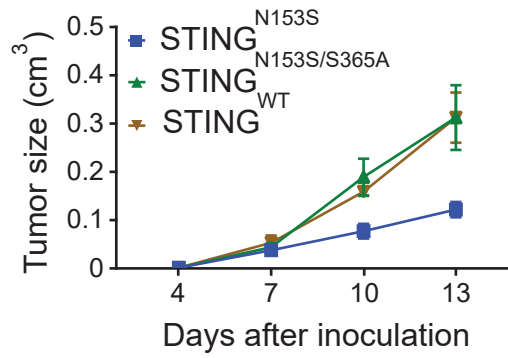

F

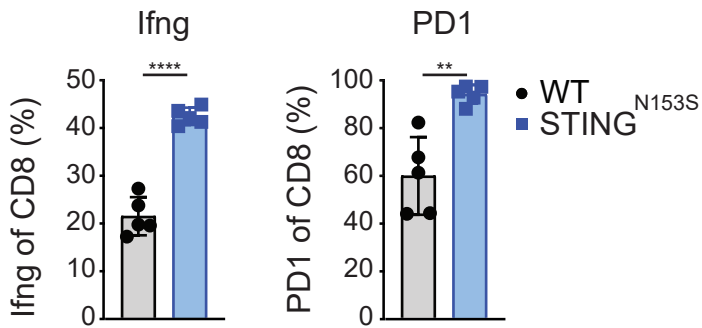

**A**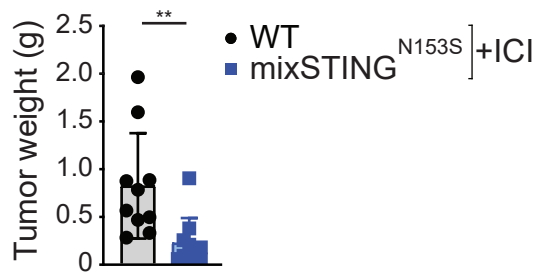**B**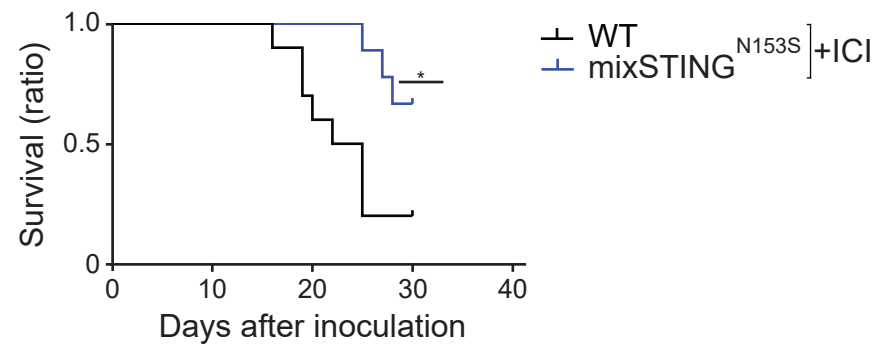

A

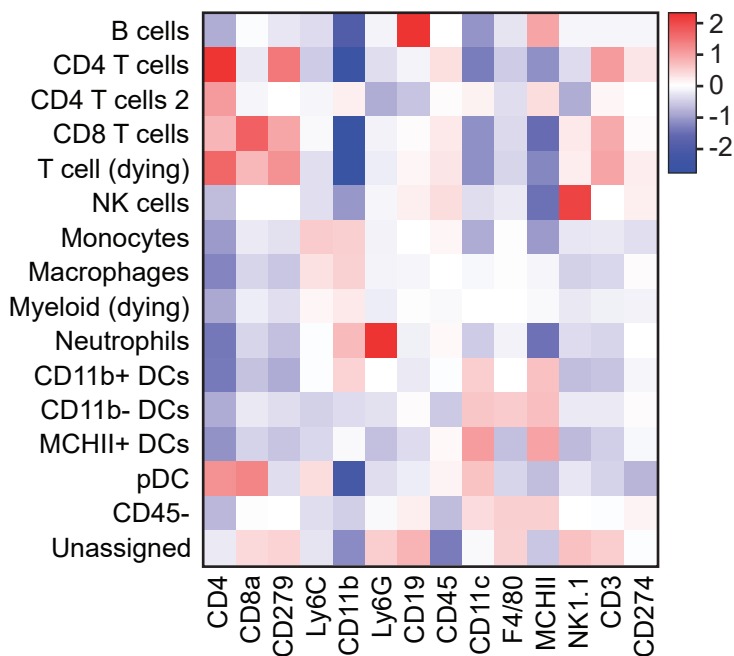

B

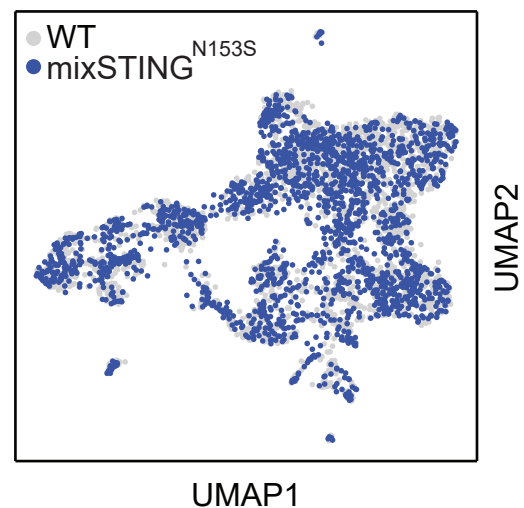

C

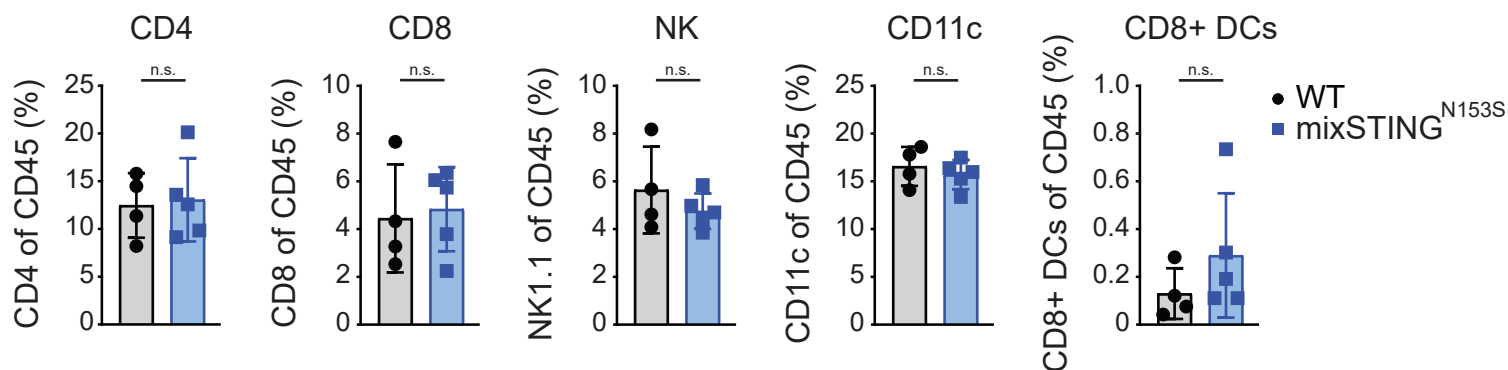

D

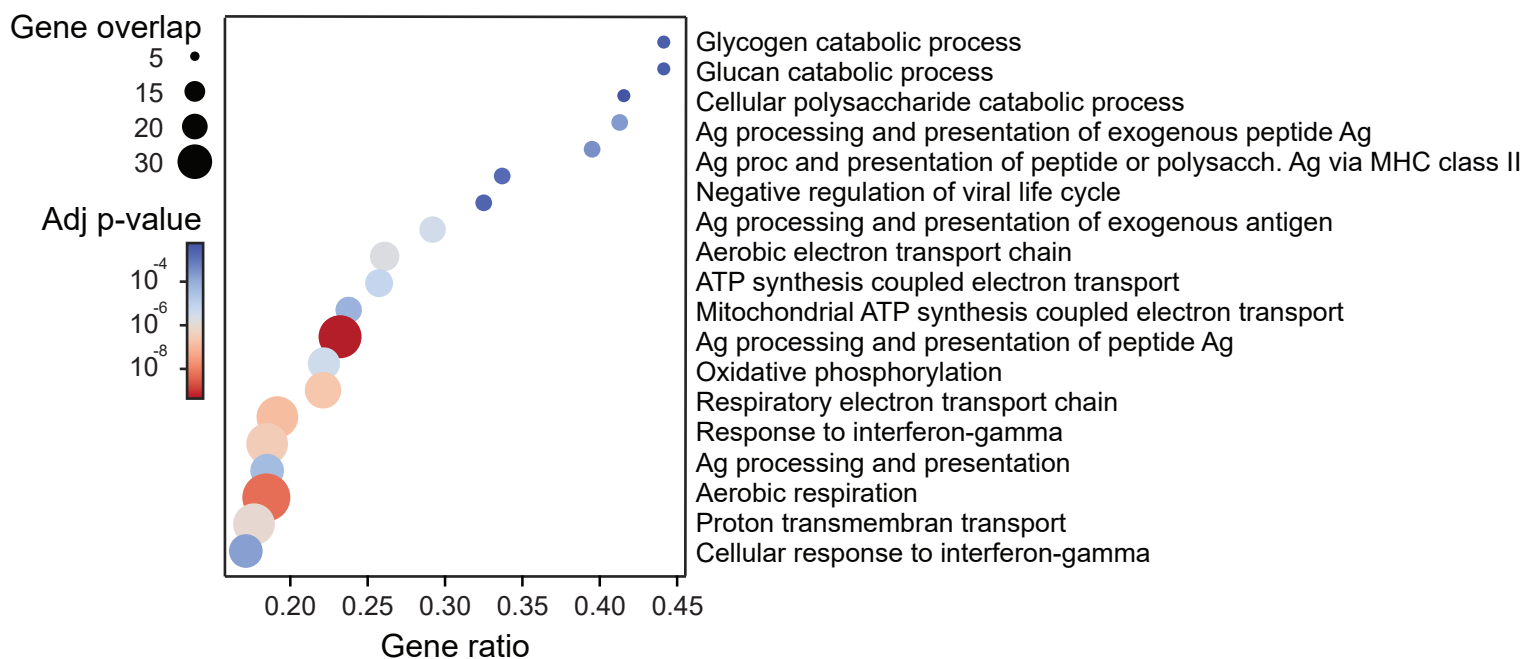

Figure S7

**Table S1.** Mutations in MMR genes in human CRC from TCGA datasets and in patient-derived CRC organoids.

**Table S2.** Total number of somatic variants and variant allele frequencies of recurrent mutations in dMMR (n=3) and pMMR (n=9) patient-derived CRC organoids.

**Table S3.** Differential gene expression analysis (DESeq2 output and GSEA) comparing human dMMR (n=3) vs. pMMR (n=9) patient-derived CRC organoids.
